# Supplementary material
Source: PubMed Central journal article supplement (PMC2889796)

## SUPPLEMENTARY DATA

FIG. S1. Relationships of Myrtaceae inferred from the Bayesian analysis of the ITS data. Majority rule consensus topology with branch lengths proportional to the inferred number of changes along that branch, clade posterior probability as indicated in Figure 1 in the main text.

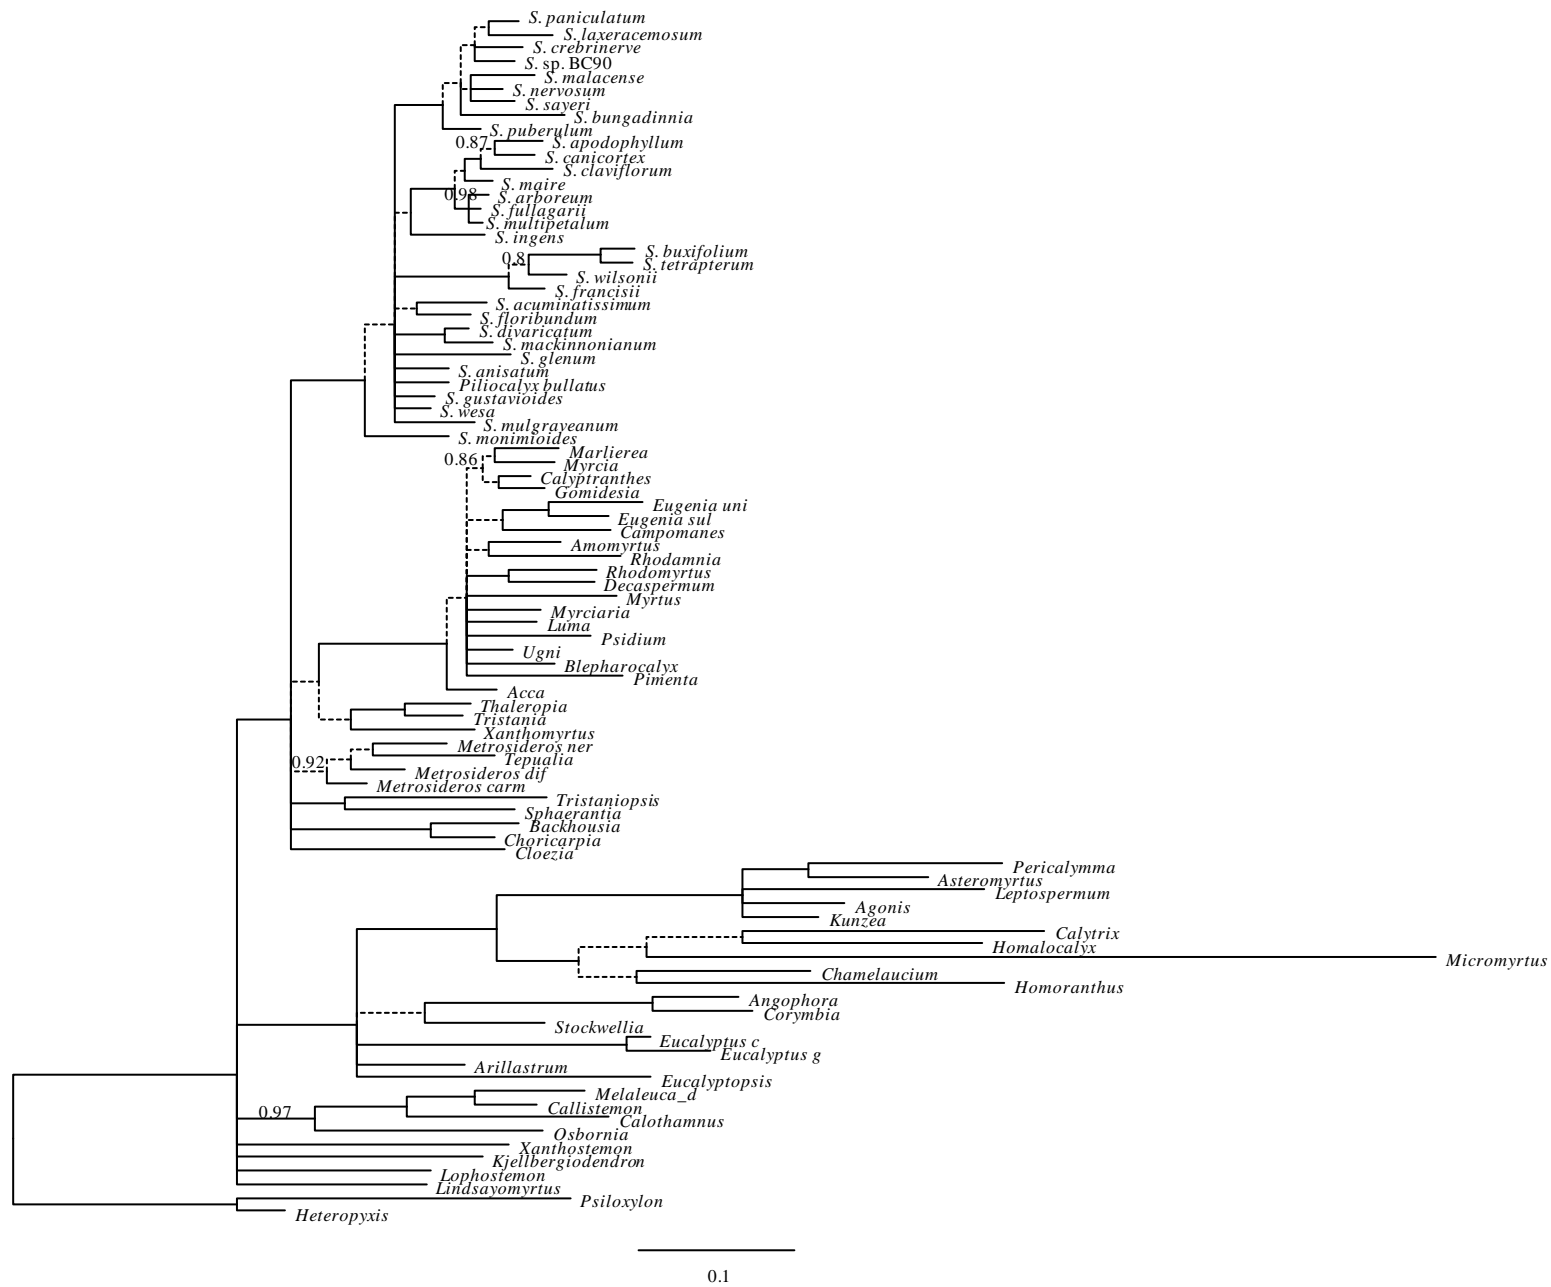

## SUPPLEMENTARY DATA

FIG. S2. Relationships of Myrtaceae inferred from the Bayesian analysis of the combined *matK* and *ndhF* data. Majority rule consensus topology, branch lengths proportional to the inferred number of changes along that branch, clade posterior probability as indicated in Figure 1 in the main text.

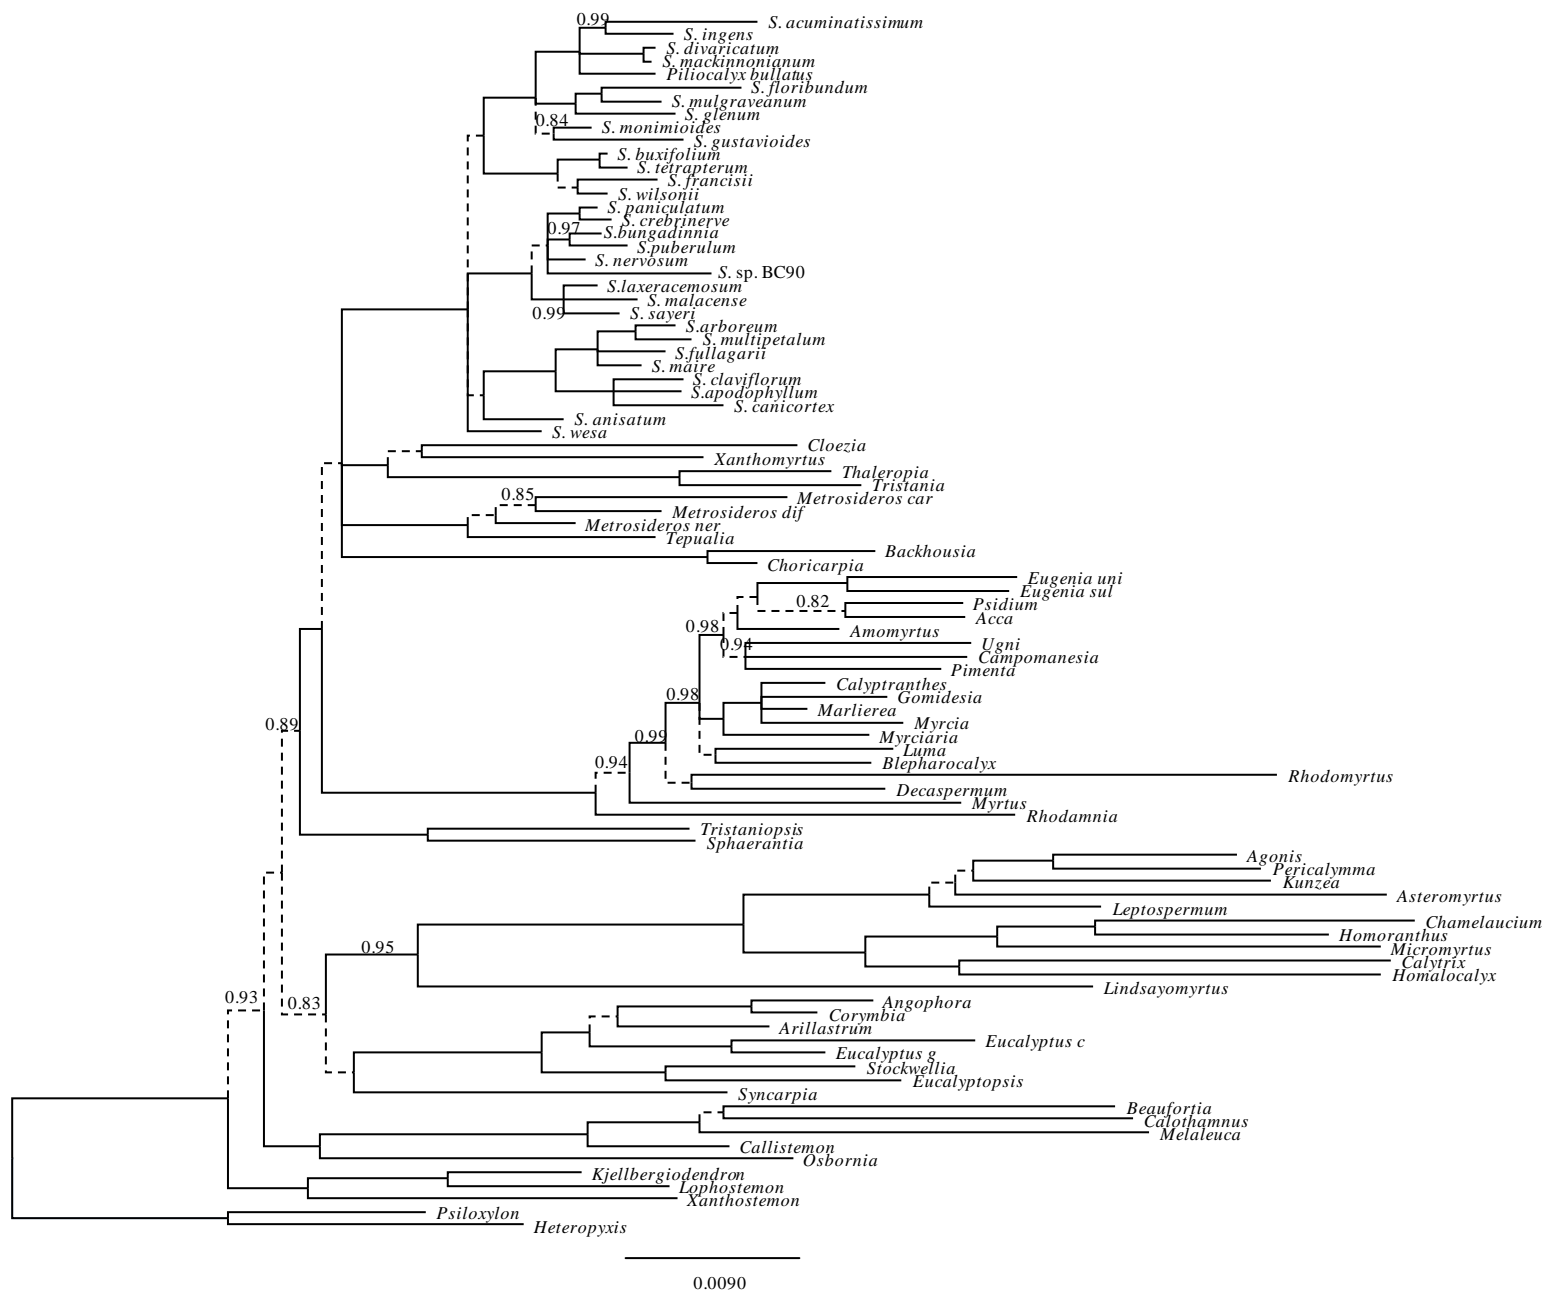

Supplement: mcq088_1.pdf [file mcq088_1.pdf]
